# Supplementary material for: Prostate specific membrane antigen (PSMA) expression in non-small cell lung cancer
Source: PLoS One. 2017 Oct 27;12(10):e0186280. doi: 10.1371/journal.pone.0186280 (PMC5659610; doi:10.1371/journal.pone.0186280)
Supplement: S2 Table — (XLSX) [file pone.0186280.s002.xlsx]

## Sheet: Tabelle1
Number	IHC PSMA Score	IHC PSMA kat	IHC Neovasc Score	IHC Neovasc kat	Age	Sex	Performance status	Tumor histology	UICC stage	Grading	Status	Overall survival (days)
1	0	PSMA negative	3	Neovasc positive	66.6	male	ECOG 1	Large Cell Carcinoma	3	G4	dead	277
2	0	PSMA negative	1	Neovasc positive	68.3	male	ECOG 1	Large Cell Carcinoma	2		dead	434
3	0	PSMA negative	1	Neovasc positive	57.6	male	ECOG 1	Large Cell Carcinoma	1	G4	dead	937
4	0	PSMA negative	2	Neovasc positive	69.6	male	ECOG 1	Large Cell Carcinoma	3	G4	alive	852
5	0	PSMA negative	2	Neovasc positive	62.3	male	ECOG 0	Large Cell Carcinoma	1	G4	dead	540
6	0	PSMA negative	2	Neovasc positive	42.9	male	ECOG 0	Large Cell Carcinoma	1	G2	alive	3571
7	0	PSMA negative	1	Neovasc positive	70	female	ECOG 1	Large Cell Carcinoma	3	G4	dead	511
8	0	PSMA negative	0	Neovasc negative	61.8	female	ECOG 1	Large Cell Carcinoma	1	G4	dead	306
9	0	PSMA negative	0	Neovasc negative	71.8	male	ECOG 1	Large Cell Carcinoma	1	G4	dead	684
10	0	PSMA negative	0	Neovasc negative	73.7	male	ECOG 1	Large Cell Carcinoma	1	G4	alive	963
11	0	PSMA negative	0	Neovasc negative	74.6	male	ECOG 1	Large Cell Carcinoma	1	G4	dead	226
12	0	PSMA negative	0	Neovasc negative	63.2	male	ECOG 1	Large Cell Carcinoma	2	G4	dead	249
13	0	PSMA negative	0	Neovasc negative	61	male	ECOG 0	Large Cell Carcinoma	1	G4	dead	1742
14	0	PSMA negative	1	Neovasc positive	72.6	female	ECOG 1	Large Cell Carcinoma	1	G4	dead	2053
15	0	PSMA negative	1	Neovasc positive	49.1	male	ECOG 0	Large Cell Carcinoma	3	G4	dead	180
16	0	PSMA negative	1	Neovasc positive	64.3	male	ECOG 1	Large Cell Carcinoma	3	G4	dead	2498
17	0	PSMA negative	0	Neovasc negative	68.7	male	ECOG 1	Large Cell Carcinoma	1		dead	507
18	1	PSMA positive	1	Neovasc positive		male		Large Cell Carcinoma	1
19	0	PSMA negative	3	Neovasc positive	67.3	male	ECOG 1	Large Cell Carcinoma	1	G4	dead	151
20	0	PSMA negative	2	Neovasc positive	74.4	male	ECOG 1	Large Cell Carcinoma	1	G3	dead	2019
21	0	PSMA negative	2	Neovasc positive	77.1	male	ECOG 1	Large Cell Carcinoma	1	G3	dead	1223
22	0	PSMA negative	2	Neovasc positive	71.2	male	ECOG 0	Large Cell Carcinoma	1	G3	alive	3422
23	0	PSMA negative	2	Neovasc positive	76.9	female	ECOG 1	Large Cell Carcinoma	2	G4	dead	62
24	0	PSMA negative	1	Neovasc positive	68.4	male	ECOG 1	Large Cell Carcinoma	2	G4	dead	1257
25	0	PSMA negative	1	Neovasc positive	66.4	female	ECOG 1	Large Cell Carcinoma	1		dead	2083
26	0	PSMA negative	1	Neovasc positive	64.7	male	ECOG 1	Large Cell Carcinoma	1	G4	alive	3202
27	0	PSMA negative	1	Neovasc positive	64.5	male	ECOG 1	Large Cell Carcinoma	2	G4	dead	281
28	0	PSMA negative	1	Neovasc positive	54.9	female	ECOG 1	Large Cell Carcinoma	1	G4	alive	1951
29	0	PSMA negative	1	Neovasc positive	58.8	female	ECOG 1	Large Cell Carcinoma	2	G3	dead	1950
30	0	PSMA negative	1	Neovasc positive	52	female	ECOG 1	Large Cell Carcinoma	3	G4	dead	80
31	0	PSMA negative	1	Neovasc positive	70.1	female	ECOG 1	Large Cell Carcinoma	1	G4	alive	3025
32	0	PSMA negative	1	Neovasc positive	66	male	ECOG 1	Large Cell Carcinoma	1	G4	alive	3748
33	0	PSMA negative	0	Neovasc negative	74.8	male	ECOG 1	Large Cell Carcinoma	1	G4
34	0	PSMA negative	0	Neovasc negative	82.8	male	ECOG 1	Large Cell Carcinoma	2	G4	dead	713
35	0	PSMA negative	0	Neovasc negative	70.9	male	ECOG 1	Large Cell Carcinoma	1	G4	dead	51
36	0	PSMA negative	0	Neovasc negative	70.2	male	ECOG 1	Large Cell Carcinoma	1	G4	dead	233
37	0	PSMA negative	0	Neovasc negative	66.4	male	ECOG 1	Large Cell Carcinoma	1	G4	dead	264
38	0	PSMA negative	0	Neovasc negative	87.6	male	ECOG 2	Large Cell Carcinoma	1	G3	dead	1460
39	0	PSMA negative	0	Neovasc negative	52.3	male	ECOG 1	Large Cell Carcinoma	2	G4	alive	4194
40	0	PSMA negative	0	Neovasc negative	60.4	male	ECOG 1	Large Cell Carcinoma	1	G4	dead	513
41	0	PSMA negative	0	Neovasc negative	66.2	male	ECOG 1	Large Cell Carcinoma	1	G2	alive	640
42	0	PSMA negative	0	Neovasc negative	66.1	female	ECOG 1	Large Cell Carcinoma	1	G3	dead	342
43	0	PSMA negative	3	Neovasc positive	67.7	male	ECOG 1	Adenocarcinoma	2	G3	dead	337
44	0	PSMA negative	1	Neovasc positive	72.5	male	ECOG 1	Adenocarcinoma	1	G2	dead	1391
45	0	PSMA negative	0	Neovasc negative	68.6	male	ECOG 1	Adenocarcinoma	1	G2	alive	2394
46	0	PSMA negative	0	Neovasc negative	58.7	male	ECOG 1	Adenocarcinoma	1	G2	alive	2748
47	0	PSMA negative	0	Neovasc negative	69.7	male	ECOG 1	Adenocarcinoma	3	G2	dead	923
48	0	PSMA negative	0	Neovasc negative	66.7	female	ECOG 1	Adenocarcinoma	1	G2	alive	2926
49	2	PSMA positive	0	Neovasc negative	62.3	male	ECOG 1	Squamous cell carcinoma	1	G3	alive	2485
50	2	PSMA positive	1	Neovasc positive	44.3	male	ECOG 1	Adenocarcinoma	1	G3	alive	2535
51	2	PSMA positive	2	Neovasc positive	72.8	male	ECOG 1	Squamous cell carcinoma	1	G3	dead	378
52	1	PSMA positive	2	Neovasc positive	71.9	female	ECOG 1	Squamous cell carcinoma	2	G2	dead	1657
53	1	PSMA positive	0	Neovasc negative	78.6	male	ECOG 1	Squamous cell carcinoma	1	G3	dead	1662
54	1	PSMA positive	2	Neovasc positive	71.1	male	ECOG 1	Adenocarcinoma	1	G2	alive	3902
55	0	PSMA negative	2	Neovasc positive	69.2	male	ECOG 1	Squamous cell carcinoma	2	G3	alive	2897
56	0	PSMA negative	2	Neovasc positive	64.7	male	ECOG 1	Squamous cell carcinoma	1	G3	alive	2950
57	0	PSMA negative	2	Neovasc positive	64.4	male		Adenocarcinoma	1	G3	alive	1431
58	0	PSMA negative	2	Neovasc positive	58.5	male	ECOG 1	Squamous cell carcinoma	1	G3	dead	293
59	0	PSMA negative	2	Neovasc positive	69.2	male	ECOG 1	Adenocarcinoma	1	G3	alive	3101
60	0	PSMA negative	2	Neovasc positive	73.8	female	ECOG 0	Adenocarcinoma	2	G2	dead	2605
61	0	PSMA negative	2	Neovasc positive	74.2	male	ECOG 1	Squamous cell carcinoma	2	G3	dead	470
62	0	PSMA negative	1	Neovasc positive	67.8	male	ECOG 1	Squamous cell carcinoma	3	G3	dead	838
63	0	PSMA negative	1	Neovasc positive	74.4	male	ECOG 1	Adenocarcinoma	1	G3	alive	2518
64	0	PSMA negative	1	Neovasc positive	75.6	female	ECOG 0	Adenocarcinoma	1	G3	dead	353
65	0	PSMA negative	1	Neovasc positive	70.7	male	ECOG 1	Squamous cell carcinoma	1	G2	dead	903
66	0	PSMA negative	1	Neovasc positive	49	male	ECOG 1	Squamous cell carcinoma	1	G3	dead	787
67	0	PSMA negative	1	Neovasc positive	72.3	male	ECOG 1	Squamous cell carcinoma	1	G3	alive	2596
68	0	PSMA negative	1	Neovasc positive	62.4	male	ECOG 2	Adenocarcinoma	1	G3	dead	854
69	0	PSMA negative	1	Neovasc positive	79.6	male	ECOG 1	Squamous cell carcinoma	1	G3	dead	372
70	0	PSMA negative	1	Neovasc positive	51.8	male	ECOG 1	Adenocarcinoma	1	G3	dead	1460
71	0	PSMA negative	1	Neovasc positive	63.6	male	ECOG 1	Squamous cell carcinoma	1	G2
72	0	PSMA negative	1	Neovasc positive	70.2	male	ECOG 0	Squamous cell carcinoma	1	G3	alive	3180
73	0	PSMA negative	1	Neovasc positive	52.7	male	ECOG 1	Squamous cell carcinoma	1	G3
74	0	PSMA negative	1	Neovasc positive	69.7	male	ECOG 1	Squamous cell carcinoma	1	G3	alive	1791
75	0	PSMA negative	1	Neovasc positive	51.8	male	ECOG 1	Squamous cell carcinoma	1	G2	alive	2808
76	0	PSMA negative	1	Neovasc positive	75.3	male	ECOG 1	Squamous cell carcinoma	1	G2	dead	840
77	0	PSMA negative	0	Neovasc negative	65.7	male	ECOG 1	Adenocarcinoma	1	G2	dead	1930
78	0	PSMA negative	0	Neovasc negative	66.6	male	ECOG 1	Adenocarcinoma	2	G3	dead	137
79	0	PSMA negative	0	Neovasc negative	72.6	male	ECOG 1	Adenocarcinoma	2	G2	alive	2232
80	0	PSMA negative	0	Neovasc negative	68.1	female	ECOG 1	Squamous cell carcinoma	1	G1	alive	2297
81	0	PSMA negative	0	Neovasc negative	59.3	male	ECOG 1	Squamous cell carcinoma	3	G2	alive	4025
82	0	PSMA negative	0	Neovasc negative	75.2	male	ECOG 1	Adenocarcinoma	1	G2	dead	246
83	0	PSMA negative	0	Neovasc negative	66	male	ECOG 1	Adenocarcinoma	3	G3	dead	647
84	0	PSMA negative	0	Neovasc negative	43.6	female	ECOG 1	Adenocarcinoma	1	G2	dead	2727
85	0	PSMA negative	0	Neovasc negative	68.5	male	ECOG 0	Squamous cell carcinoma	2	G3	alive	1059
86	0	PSMA negative	0	Neovasc negative	58.3	male	ECOG 0	Adenocarcinoma	1	G3	alive	3711
87	0	PSMA negative	0	Neovasc negative	71.9	male	ECOG 1	Adenocarcinoma	1	G1	dead	2040
88	0	PSMA negative	0	Neovasc negative	76.7	male	ECOG 2	Squamous cell carcinoma	1	G3	dead	169
89	0	PSMA negative	0	Neovasc negative	53	male	ECOG 0	Adenocarcinoma	1	G2	dead	311
90	0	PSMA negative	0	Neovasc negative	72.1	female	ECOG 1	Adenocarcinoma	3	G2	dead	1321
91	0	PSMA negative	0	Neovasc negative	61.5	female	ECOG 1	Adenocarcinoma	2	G3	alive
92	0	PSMA negative	0	Neovasc negative	76.7	female	ECOG 0	Adenocarcinoma	1	G2	alive	2587
93	0	PSMA negative	0	Neovasc negative	71.5	female	ECOG 0	Adenocarcinoma	2	G3	dead	667
94	0	PSMA negative	0	Neovasc negative	66.1	male	ECOG 1	Squamous cell carcinoma	2	G2	dead	40
95	2	PSMA positive	0	Neovasc negative	58.5	male	ECOG 1	Squamous cell carcinoma	2	G3	dead	311
96	2	PSMA positive	0	Neovasc negative	71.9	female	ECOG 1	Squamous cell carcinoma	1	G3	dead	2141
97	0	PSMA negative	2	Neovasc positive	68.9	male	ECOG 1	Squamous cell carcinoma	1	G3	dead	499
98	0	PSMA negative	1	Neovasc positive	64.6	male	ECOG 1	Adenocarcinoma	1	G3	alive	936
99	0	PSMA negative	1	Neovasc positive	54.2	male	ECOG 1	Squamous cell carcinoma	2	G3	alive	2414
100	0	PSMA negative	1	Neovasc positive	67.2	male	ECOG 2	Squamous cell carcinoma	1	G3	dead	2874
101	0	PSMA negative	1	Neovasc positive	66.1	female	ECOG 1	Adenocarcinoma	1	G3	alive	3137
102	0	PSMA negative	1	Neovasc positive	69.1	male	ECOG 1	Squamous cell carcinoma	2	G3	dead	1241
103	0	PSMA negative	1	Neovasc positive	62.1	male	ECOG 1	Adenocarcinoma	1	G2	alive	1982
104	0	PSMA negative	0	Neovasc negative	64.6	male	ECOG 1	Squamous cell carcinoma	1	G2	dead	2217
105	0	PSMA negative	0	Neovasc negative	66.2	male	ECOG 1	Adenocarcinoma	2	G3	dead	2116
106	0	PSMA negative	0	Neovasc negative	64.2	male	ECOG 1	Adenocarcinoma	1	G2	alive	2562
107	0	PSMA negative	0	Neovasc negative	73	male	ECOG 1	Adenocarcinoma	1	G2	dead	2207
108	3	PSMA positive	1	Neovasc positive	64.1	male	ECOG 1	Squamous cell carcinoma	1	G2	dead	2135
109	1	PSMA positive	2	Neovasc positive	81.7	male	ECOG 1	Squamous cell carcinoma	1	G3	dead	1121
110	1	PSMA positive	1	Neovasc positive	58.4	female	ECOG 1	Squamous cell carcinoma	1	G3	dead	137
111	1	PSMA positive	1	Neovasc positive	63.7	male	ECOG 0	Squamous cell carcinoma	2	G3	dead	884
112	1	PSMA positive	0	Neovasc negative	59.3	male	ECOG 1	Squamous cell carcinoma	1	G2	alive	2173
113	1	PSMA positive	3	Neovasc positive	64.5	male	ECOG 1	Squamous cell carcinoma	1	G3	dead	876
114	1	PSMA positive	0	Neovasc negative	60.9	female		Squamous cell carcinoma	1	G2	alive	1416
115	1	PSMA positive	1	Neovasc positive	54.6	male	ECOG 0	Squamous cell carcinoma	1	G2	alive	2894
116	0	PSMA negative	2	Neovasc positive	61.5	male	ECOG 1	Adenocarcinoma	1	G3	dead	157
117	0	PSMA negative	2	Neovasc positive	49	male	ECOG 0	Adenocarcinoma	1	G2	dead	610
118	0	PSMA negative	2	Neovasc positive	58.7	male	ECOG 1	Squamous cell carcinoma	1	G2	alive	1482
119	0	PSMA negative	2	Neovasc positive	48.2	female	ECOG 1	Adenocarcinoma	1	G3	alive	3934
120	0	PSMA negative	2	Neovasc positive	64.3	male	ECOG 0	Squamous cell carcinoma	1	G3	dead	2408
121	0	PSMA negative	2	Neovasc positive	65	male	ECOG 1	Squamous cell carcinoma	1	G3	alive	2717
122	0	PSMA negative	2	Neovasc positive	60.7	male	ECOG 1	Adenocarcinoma	1	G3	dead	1963
123	0	PSMA negative	2	Neovasc positive	49.3	male	ECOG 1	Squamous cell carcinoma	1	G3	dead	1940
124	0	PSMA negative	2	Neovasc positive	70.7	male	ECOG 1	Squamous cell carcinoma	1	G3	alive	1690
125	0	PSMA negative	2	Neovasc positive	72.2	male	ECOG 1	Squamous cell carcinoma	1	G2	dead	1934
126	0	PSMA negative	2	Neovasc positive	67.5	male	ECOG 1	Squamous cell carcinoma	1	G2	dead	522
127	0	PSMA negative	2	Neovasc positive	70.3	male	ECOG 1	Squamous cell carcinoma	2	G3	alive	2473
128	0	PSMA negative	2	Neovasc positive	66.2	male	ECOG 1	Squamous cell carcinoma	2	G2	dead	1316
129	0	PSMA negative	2	Neovasc positive	65.2	male	ECOG 2	Squamous cell carcinoma	3	G3	dead	360
130	0	PSMA negative	2	Neovasc positive	58.2	male	ECOG 1	Squamous cell carcinoma	1	G3	alive	3106
131	0	PSMA negative	2	Neovasc positive	70.9	female	ECOG 1	Squamous cell carcinoma	3	G3	dead	509
132	0	PSMA negative	2	Neovasc positive	67.2	male		Squamous cell carcinoma	1	G2	dead	506
133	0	PSMA negative	2	Neovasc positive	57.2	male		Squamous cell carcinoma	1	G2	dead	1157
134	0	PSMA negative	2	Neovasc positive	73.5	male		Adenocarcinoma	3	G2	dead	1287
135	0	PSMA negative	2	Neovasc positive	67.9	male	ECOG 1	Adenocarcinoma	1	G3	dead	2096
136	0	PSMA negative	1	Neovasc positive	63.4	male	ECOG 1	Squamous cell carcinoma	3	G3	dead	382
137	0	PSMA negative	1	Neovasc positive	62.3	male	ECOG 1	Adenocarcinoma	2	G3	alive	2775
138	0	PSMA negative	1	Neovasc positive	40.6	male	ECOG 1	Adenocarcinoma	1	G3	alive	2681
139	0	PSMA negative	1	Neovasc positive	81.5	female	ECOG 1	Squamous cell carcinoma	1	G3	alive	2558
140	0	PSMA negative	1	Neovasc positive	65.7	male	ECOG 1	Squamous cell carcinoma	1	G3	dead	1390
141	0	PSMA negative	1	Neovasc positive	57.5	male	ECOG 1	Adenocarcinoma	1	G2	alive	2128
142	0	PSMA negative	1	Neovasc positive	79	male	ECOG 2	Adenocarcinoma	3	G3	dead	79
143	0	PSMA negative	1	Neovasc positive	84.4	male	ECOG 1	Squamous cell carcinoma	2	G3	dead	882
144	0	PSMA negative	1	Neovasc positive	67.8	female	ECOG 0	Adenocarcinoma	2	G3	dead	1597
145	0	PSMA negative	1	Neovasc positive	64.4	male	ECOG 1	Adenocarcinoma	2	G2	dead	608
146	0	PSMA negative	1	Neovasc positive	62.4	male	ECOG 1	Squamous cell carcinoma	3	G3	dead	478
147	0	PSMA negative	1	Neovasc positive	58.8	male	ECOG 0	Squamous cell carcinoma	2	G3	dead	802
148	0	PSMA negative	1	Neovasc positive	65.1	male	ECOG 1	Adenocarcinoma	1	G3	dead	688
149	0	PSMA negative	1	Neovasc positive	68.7	male	ECOG 1	Squamous cell carcinoma	1	G3	alive	2534
150	0	PSMA negative	1	Neovasc positive	63.4	male	ECOG 1	Squamous cell carcinoma	2	G3	alive	1118
151	0	PSMA negative	1	Neovasc positive	74.8	male	ECOG 1	Squamous cell carcinoma	1	G3	dead	503
152	0	PSMA negative	1	Neovasc positive	74.7	male	ECOG 1	Squamous cell carcinoma	1	G3	dead	669
153	0	PSMA negative	1	Neovasc positive	63.2	male	ECOG 1	Squamous cell carcinoma	1	G3	alive	2484
154	0	PSMA negative	1	Neovasc positive	65.2	female	ECOG 1	Squamous cell carcinoma	1	G3	alive	1567
155	0	PSMA negative	1	Neovasc positive	70.5	male	ECOG 1	Adenocarcinoma	1	G3	alive	2155
156	0	PSMA negative	1	Neovasc positive	75.3	male	ECOG 1	Adenocarcinoma	1	G2	alive	1173
157	0	PSMA negative	1	Neovasc positive	76.5	male	ECOG 2	Adenocarcinoma	3	G3	dead	227
158	0	PSMA negative	1	Neovasc positive	67.4	male	ECOG 1	Adenocarcinoma	1	G2	dead	1056
159	0	PSMA negative	1	Neovasc positive	74.4	male	ECOG 1	Squamous cell carcinoma	2	G3	dead	1322
160	0	PSMA negative	1	Neovasc positive	76.2	female	ECOG 1	Adenocarcinoma	2	G3	dead	922
161	0	PSMA negative	1	Neovasc positive	78.7	male	ECOG 1	Adenocarcinoma	1	G3	dead	1324
162	0	PSMA negative	1	Neovasc positive	80.3	female	ECOG 1	Squamous cell carcinoma	2	G2	dead	1076
163	0	PSMA negative	1	Neovasc positive	58.3	male	ECOG 2	Squamous cell carcinoma	1	G3	dead	2879
164	0	PSMA negative	1	Neovasc positive	64	male	ECOG 1	Squamous cell carcinoma	2	G3	dead	156
165	0	PSMA negative	1	Neovasc positive	60.2	male	ECOG 1	Squamous cell carcinoma	1	G3	alive	3269
166	0	PSMA negative	1	Neovasc positive	54.6	female	ECOG 1	Adenocarcinoma	1	G2	alive	3051
167	0	PSMA negative	1	Neovasc positive	75.1	male	ECOG 1	Squamous cell carcinoma	1	G3	alive	2747
168	0	PSMA negative	1	Neovasc positive	69.5	male	ECOG 0	Squamous cell carcinoma	1	G3	dead	1620
169	0	PSMA negative	1	Neovasc positive	70.1	male	ECOG 1	Squamous cell carcinoma	3	G3	dead	920
170	0	PSMA negative	1	Neovasc positive	69.3	male	ECOG 2	Squamous cell carcinoma	2	G3	dead	347
171	0	PSMA negative	1	Neovasc positive	82.4	male	ECOG 2	Squamous cell carcinoma	3	G3	dead	2199
172	0	PSMA negative	1	Neovasc positive	77	male	ECOG 1	Squamous cell carcinoma	1	G3	dead	2873
173	0	PSMA negative	1	Neovasc positive	52.4	male	ECOG 1	Adenocarcinoma	1	G3	alive	2744
174	0	PSMA negative	1	Neovasc positive	64.5	male	ECOG 1	Adenocarcinoma	1	G2	dead	941
175	0	PSMA negative	1	Neovasc positive	77.2	female	ECOG 0	Adenocarcinoma	1	G2	dead	763
176	0	PSMA negative	1	Neovasc positive	55.6	male	ECOG 1	Adenocarcinoma	2	G2	dead	569
177	0	PSMA negative	1	Neovasc positive	75.6	male	ECOG 0	Squamous cell carcinoma	2	G3	dead	582
178	0	PSMA negative	1	Neovasc positive	45.4	male	ECOG 1	Squamous cell carcinoma	1	G3	alive	2349
179	0	PSMA negative	1	Neovasc positive	59.5	male	ECOG 0	Adenocarcinoma	1	G1	dead	2419
180	0	PSMA negative	1	Neovasc positive	57.3	female	ECOG 1	Adenocarcinoma	1	G2	alive	2582
181	0	PSMA negative	1	Neovasc positive	74.4	male	ECOG 2	Squamous cell carcinoma	1	G3	alive	1346
182	0	PSMA negative	0	Neovasc negative	67.8	male	ECOG 1	Adenocarcinoma	2	G2	dead	900
183	0	PSMA negative	0	Neovasc negative	78.2	male	ECOG 1	Squamous cell carcinoma	2	G2	dead	1068
184	0	PSMA negative	0	Neovasc negative	63.9	male	ECOG 1	Squamous cell carcinoma	2	G2	dead	128
185	0	PSMA negative	0	Neovasc negative	55.8	female	ECOG 1	Adenocarcinoma	1	G3	alive	2428
186	0	PSMA negative	0	Neovasc negative	64.3	male	ECOG 1	Adenocarcinoma	1	G2	alive	2521
187	0	PSMA negative	0	Neovasc negative	76.4	male	ECOG 1	Squamous cell carcinoma	1	G2	dead	299
188	0	PSMA negative	0	Neovasc negative	62.3	male	ECOG 1	Adenocarcinoma	1	G2	alive	2464
189	0	PSMA negative	0	Neovasc negative	71	male	ECOG 1	Adenocarcinoma	1	G3	dead	403
190	0	PSMA negative	0	Neovasc negative	71.1	male	ECOG 1	Squamous cell carcinoma	1	G2	alive	2574
191	0	PSMA negative	0	Neovasc negative	70.4	female	ECOG 1	Adenocarcinoma	1	G3	alive	2590
192	0	PSMA negative	0	Neovasc negative	50	female	ECOG 1	Adenocarcinoma	1	G2	alive	2477
193	0	PSMA negative	0	Neovasc negative	78.8	male	ECOG 1	Squamous cell carcinoma	1	G2	dead	765
194	0	PSMA negative	0	Neovasc negative	47.2	male	ECOG 1	Squamous cell carcinoma	1	G2
195	0	PSMA negative	0	Neovasc negative	75.9	male	ECOG 1	Adenocarcinoma	1	G3	dead	180
196	0	PSMA negative	0	Neovasc negative	68.1	male	ECOG 1	Squamous cell carcinoma	1	G4	dead	287
197	0	PSMA negative	0	Neovasc negative	64.6	male	ECOG 1	Squamous cell carcinoma	2	G2	dead	136
198	0	PSMA negative	0	Neovasc negative	68.5	female	ECOG 1	Squamous cell carcinoma	1	G3	alive	2656
199	0	PSMA negative	0	Neovasc negative	61.7	male	ECOG 1	Adenocarcinoma	1	G2	alive	2653
200	0	PSMA negative	0	Neovasc negative	70.2	male	ECOG 0	Squamous cell carcinoma	1	G3	dead	527
201	0	PSMA negative	0	Neovasc negative	78.1	male	ECOG 1	Adenocarcinoma	1	G2	alive	2118
202	0	PSMA negative	0	Neovasc negative	75.8	male	ECOG 1	Squamous cell carcinoma	1	G3	dead	771
203	0	PSMA negative	0	Neovasc negative	60.3	male	ECOG 1	Squamous cell carcinoma	3	G2	dead	1055
204	0	PSMA negative	0	Neovasc negative	77.6	female	ECOG 1	Adenocarcinoma	1	G2	alive	2161
205	0	PSMA negative	0	Neovasc negative	65.2	male	ECOG 0	Squamous cell carcinoma	1	G3	dead	1028
206	0	PSMA negative	0	Neovasc negative		female		Squamous cell carcinoma	1
207	0	PSMA negative	0	Neovasc negative	76.4	female	ECOG 1	Adenocarcinoma	2	G2	dead	756
208	0	PSMA negative	0	Neovasc negative	67.1	male	ECOG 1	Adenocarcinoma	1	G2	alive	1330
209	0	PSMA negative	0	Neovasc negative	72.8	female	ECOG 1	Adenocarcinoma	1	G2	dead	185
210	0	PSMA negative	0	Neovasc negative	67.6	female	ECOG 1	Adenocarcinoma	1	G2	alive	1138
211	0	PSMA negative	0	Neovasc negative	62.1	male	ECOG 1	Squamous cell carcinoma	1	G3	dead	3120
212	0	PSMA negative	0	Neovasc negative	48.4	female	ECOG 1	Adenocarcinoma	1	G2	alive	1040
213	0	PSMA negative	0	Neovasc negative	69.7	female	ECOG 1	Adenocarcinoma	1	G2	alive	464
214	0	PSMA negative	0	Neovasc negative	77.9	male	ECOG 1	Adenocarcinoma	3	G2	dead	1277
215	0	PSMA negative	0	Neovasc negative	59.2	male	ECOG 0	Squamous cell carcinoma	2	G3	alive	4034
216	0	PSMA negative	0	Neovasc negative	73.9	male	ECOG 0	Squamous cell carcinoma	2	G3	dead	1316
217	0	PSMA negative	0	Neovasc negative	63.4	female	ECOG 1	Adenocarcinoma	1	G3	dead	3596
218	0	PSMA negative	0	Neovasc negative	48.9	female	ECOG 1	Adenocarcinoma	1	G3	alive	4105
219	0	PSMA negative	0	Neovasc negative	77.4	female	ECOG 1	Squamous cell carcinoma	2	G3	dead	649
220	0	PSMA negative	0	Neovasc negative	64.5	male	ECOG 1	Squamous cell carcinoma	1	G3	dead	785
221	0	PSMA negative	0	Neovasc negative	66.7	male	ECOG 1	Squamous cell carcinoma	1	G2	alive	3074
222	0	PSMA negative	0	Neovasc negative	66	male	ECOG 1	Squamous cell carcinoma	3	G3	alive	811
223	0	PSMA negative	0	Neovasc negative	72.9	female	ECOG 2	Squamous cell carcinoma	1	G2	alive	3360
224	0	PSMA negative	0	Neovasc negative	62.9	male	ECOG 0	Adenocarcinoma	1	G2	dead	2740
225	0	PSMA negative	0	Neovasc negative	67.6	male	ECOG 1	Adenocarcinoma	1	G2	dead	1156
226	0	PSMA negative	0	Neovasc negative	52.3	male	ECOG 1	Adenocarcinoma	1	G1	dead	4002
227	0	PSMA negative	0	Neovasc negative	52.8	female	ECOG 0	Adenocarcinoma	1	G2	alive	2627
228	0	PSMA negative	0	Neovasc negative	49.1	female	ECOG 0	Adenocarcinoma	1	G2	alive	3745
229	0	PSMA negative	0	Neovasc negative	66	male	ECOG 1	Squamous cell carcinoma	1	G3	dead	1092
230	0	PSMA negative	0	Neovasc negative	64.1	male	ECOG 1	Adenocarcinoma	1	G3	alive	2841
231	0	PSMA negative	0	Neovasc negative	61.9	male	ECOG 1	Squamous cell carcinoma	1	G3
232	0	PSMA negative	0	Neovasc negative	71.4	male	ECOG 2	Squamous cell carcinoma	1	G3	dead	801
233	0	PSMA negative	0	Neovasc negative	57.6	male	ECOG 1	Squamous cell carcinoma	2	G3	dead	69
234	0	PSMA negative	0	Neovasc negative	73.8	female	ECOG 1	Squamous cell carcinoma	1	G3	dead	1054
235	0	PSMA negative	0	Neovasc negative	64.8	male	ECOG 1	Squamous cell carcinoma	1	G3	dead	685
236	0	PSMA negative	0	Neovasc negative	62.6	female	ECOG 1	Squamous cell carcinoma	1	G3	dead	286
237	0	PSMA negative	0	Neovasc negative	78.8	male	ECOG 1	Squamous cell carcinoma	2	G3	dead	934
238	0	PSMA negative	0	Neovasc negative	65.3	male	ECOG 0	Squamous cell carcinoma	1	G3	dead	2595
239	0	PSMA negative	0	Neovasc negative	68.3	male	ECOG 2	Adenocarcinoma	1	G3	dead	418
240	0	PSMA negative	0	Neovasc negative	64.8	male	ECOG 1	Squamous cell carcinoma	1	G3	dead	1592
241	0	PSMA negative	0	Neovasc negative	72.4	female	ECOG 1	Adenocarcinoma	1	G3	dead	225
242	0	PSMA negative	0	Neovasc negative	77.7	male	ECOG 1	Adenocarcinoma	1	G2	dead	715
243	0	PSMA negative	0	Neovasc negative	58.9	male	ECOG 0	Adenocarcinoma	1	G2	dead	1194
244	0	PSMA negative	0	Neovasc negative	55.2	female	ECOG 1	Adenocarcinoma	1	G2	alive	1938
245	0	PSMA negative	0	Neovasc negative	59.6	female	ECOG 0	Adenocarcinoma	2	G3	alive	2268
246	0	PSMA negative	0	Neovasc negative	53.1	female	ECOG 0	Adenocarcinoma	2	G2	alive	3365
247	0	PSMA negative	0	Neovasc negative	74.5	male	ECOG 0	Adenocarcinoma	3	G2	dead	1205
248	0	PSMA negative	0	Neovasc negative	72.2	male	ECOG 1	Adenocarcinoma	1	G3	dead	1540
249	0	PSMA negative	0	Neovasc negative	83.2	female	ECOG 0	Adenocarcinoma	1	G2	alive	2497
250	0	PSMA negative	0	Neovasc negative	44.6	male	ECOG 0	Adenocarcinoma	2	G3	dead	2612
251	0	PSMA negative	0	Neovasc negative	77.4	male	ECOG 0	Adenocarcinoma	1	G3	dead	460
252	0	PSMA negative	0	Neovasc negative	76.1	female	ECOG 1	Adenocarcinoma	1	G2	alive	3387
253	0	PSMA negative	0	Neovasc negative	63.6	male	ECOG 0	Squamous cell carcinoma	2	G3	dead	614
254	0	PSMA negative	0	Neovasc negative	69.9	male	ECOG 1	Squamous cell carcinoma	1	G3	dead	1031
255	0	PSMA negative	0	Neovasc negative	75.1	male	ECOG 0	Squamous cell carcinoma	2		dead	438
256	0	PSMA negative	0	Neovasc negative	64.7	male	ECOG 1	Squamous cell carcinoma	1	G2	dead	1231
257	0	PSMA negative	0	Neovasc negative	62.3	male	ECOG 1	Squamous cell carcinoma	1	G2	dead	91
258	0	PSMA negative	0	Neovasc negative	65	female	ECOG 0	Adenocarcinoma	1	G2	alive	2770
259	0	PSMA negative	0	Neovasc negative	69.7	male	ECOG 1	Adenocarcinoma	3	G3	dead	1362
260	0	PSMA negative	0	Neovasc negative	65	male	ECOG 1	Adenocarcinoma	1	G1	dead	1256
261	0	PSMA negative	0	Neovasc negative	73.3	male	ECOG 0	Adenocarcinoma	1	G1	dead	810
262	0	PSMA negative	0	Neovasc negative	57.8	female	ECOG 0	Adenocarcinoma	2	G2	dead	269
263	0	PSMA negative	0	Neovasc negative	59.8	male	ECOG 0	Squamous cell carcinoma	2	G2	dead	776
264	0	PSMA negative	0	Neovasc negative	66.9	male	ECOG 0	Adenocarcinoma	2	G3	alive	2678
265	0	PSMA negative	0	Neovasc negative	66.7	male		Adenocarcinoma	1	G2	alive	1531
266	0	PSMA negative	0	Neovasc negative	64.7	male		Squamous cell carcinoma	1	G3	dead	28
267	0	PSMA negative	0	Neovasc negative	72.3	male	ECOG 1	Squamous cell carcinoma	2	G3	alive	1495
268	0	PSMA negative	0	Neovasc negative	42.9	female	ECOG 0	Adenocarcinoma	1	G2	dead	1033
269	0	PSMA negative	0	Neovasc negative	66	female		Adenocarcinoma	2	G3	alive	1237
270	0	PSMA negative	0	Neovasc negative	56.4	female		Adenocarcinoma	3	G3	dead	157
271	0	PSMA negative	1	Neovasc positive	70.2	male	ECOG 1	Squamous cell carcinoma	1	G2	dead	1599
272	0	PSMA negative	0	Neovasc negative	70.6	female	ECOG 1	Adenocarcinoma	1	G3	alive	2911
273	0	PSMA negative	1	Neovasc positive	53.8	male	ECOG 0	Squamous cell carcinoma	2	G2	alive	2948
274	0	PSMA negative	1	Neovasc positive	64.5	male	ECOG 1	Adenocarcinoma	1	G3	alive	2644
275	0	PSMA negative	0	Neovasc negative	63.7	female		Adenocarcinoma	3	G2	dead	797
